## ARTICLE

# Integrating Complementary and Traditional Practices in Middle-Eastern Supportive Cancer Care

Eran Ben-Arye, Noah Samuels, Michel Daher, Ibrahim Turker, Omar Nimri, Maryam Rassouli, Michael Silbermann

**Affiliations of authors:** Integrative Oncology Program, The Oncology Service, Lin Medical Center, Clalit Health Services, Haifa and Western Galilee District, Israel (EBA); Rappaport Faculty of Medicine, Technion-Israel Institute of Technology, Haifa, Israel (EBA, NS); Tal Center for Integrative Oncology, Institute of Oncology, Sheba Medical Center, Tel Hashomer, Israel (NS); University of Balamand, Saint George Hospital, UMC, Beirut, Lebanon (MD); Dr. Abdurrahman Yurtaslan Oncology Training and Research Hospital, Ankara, Turkey (IT); Jordan Cancer Registry, Ministry of Health, Amman, The Hashemite Kingdom of Jordan (ON); Shahid Beheshti University of Medical Sciences, Teheran, Iran (MR); Middle East Cancer Consortium, Haifa, Israel (MS).

**Correspondence to:** Eran Ben-Arye, MD, The Oncology Service, Lin Medical Center, 35 Rothschild St., Haifa, Israel (e-mail: eranben@netvision.net.il).

## Abstract

The Middle East is a promising arena in which researchers can explore the interchange between cross-cultural traditional medicine and supportive cancer care, as provided within an integrative oncology setting. Integrative oncology research and clinical practice in this part of the world have been focusing, for the most part, on the use of herbal medicine and mind-body-spiritual modalities, both of which are deeply rooted in traditional medical care. A regional, multinational, and interdisciplinary collaboration is currently being undertaken as part of the academic activities of the Middle-East Research Group in Integrative Oncology (MERGIO). This group is part of the Middle-East Cancer Consortium, a body supported by the National Cancer Institute. MERGIO currently facilitates a number of innovative educational, basic science, and clinical research projects that are investigating the effectiveness and safety of traditional herbal remedies. In order to create a structured, pragmatic “bedside-to-bench” and subsequent “back-to bedside” approach, MERGIO has designed a patient-tailored integrative oncology model of supportive-palliative care. This approach addresses both patients’ individual health belief models and the larger social-cultural-religious context, as defined by the health-related values of the patient’s community.

## The Middle East as a “Laboratory” for Investigating the Integration of Traditional Medicine in Supportive Cancer Care

During the past decade, the Middle East has emerged as one of the most promising arenas for the exploration of the integration of traditional medicine in supportive and palliative cancer care. The research taking place is reflective of the richly diverse social, cultural, and religious communities that range from Morocco in the west to Iran in the east; and from Turkey and the former Soviet Union southern republics in the north to Saudi Arabia in the south. For centuries, traditional medicine has been playing a central role in patient care, from the ancient medical schools of Egypt and Mesopotamia through the rise of the three monotheistic religions of Judaism, Christianity, and

Islam. This has further expanded the medical knowledge of the time, providing it with a historical role as a mediator between the Western Greco-Roman and the Eastern Chinese and Ayurvedic schools of medicine. This rich traditional medicinal heritage can still be seen today in the deep affinity throughout today’s Middle East toward traditional medicine, especially with respect to the use of herbal medicine.

Complementary and traditional medicine (CTM) is extremely popular among patients with cancer in Middle-Eastern countries. Rates of CTM use in this region range from 35% in Iran to 46% in Morocco, 51% in Israel, 57% in Turkey, 90% in Saudi Arabia, and nearly 100% in Jordan (1). In many of these countries, CTM is still regarded as an alternative to conventional oncology care, or else as a complementary approach whose goal is to provide beneficial effects from both “natural” and scientific

Received: November 15, 2016; Revised: January 21, 2017; Accepted: July 25, 2017

© The Author 2017. Published by Oxford University Press. All rights reserved. For Permissions, please e-mail: journals.permissions@oup.com.

Table 1. Examples of Middle-Eastern clinical trials in integrative oncology

| Country                              | CIM* modality                              | Study format                                                                                                                       | Impact of CIM on supportive care-related outcomes                                                                                                                                     | First author, journal, year (ref.)                                  |
|--------------------------------------|--------------------------------------------|------------------------------------------------------------------------------------------------------------------------------------|---------------------------------------------------------------------------------------------------------------------------------------------------------------------------------------|---------------------------------------------------------------------|
| Cyprus                               | Mind-body medicine                         | Randomized                                                                                                                         | Muscle relaxation and guided imagery reduces anxiety and depression in patients undergoing chemotherapy (breast and prostate cancer)                                                  | Charalambous, <i>Evid Based Complement Alternat Med</i> , 2015 (12) |
| Egypt                                | Herbal/traditional medicine                | Randomized                                                                                                                         | Prophylactic use of honey reduces radiochemotherapy-induced mucositis (head/neck cancer)                                                                                              | Rashad, <i>J Laryngol Otol</i> , 2008 (13)                          |
|                                      |                                            | Randomized                                                                                                                         | Honey induces faster healing in patients with grade 2/3 chemotherapy-induced mucositis (acute lymphoblastic leukemia)                                                                 | Abdulrhman, <i>Pediatr Hematol Oncol</i> , 2012 (14)                |
| Iran                                 | Herbal/traditional medicine                | Randomized                                                                                                                         | Application of honey improves radiation-induced mucositis (head/neck cancer)                                                                                                          | Motallebnejad, <i>J Contemp Dent Pract</i> , 2008 (15)              |
|                                      |                                            | Randomized                                                                                                                         | Mouthwash with the herb <i>Achillea millefolium</i> improves chemotherapy-induced oral mucositis                                                                                      | Miranzadeh, <i>Eur J Oncol Nurs</i> , 2015 (16)                     |
|                                      |                                            | Randomized                                                                                                                         | Herbal compound ( <i>Malva sylvestris</i> and <i>Alcea digitata</i> ) improves xerostomia (head/neck cancer)                                                                          | Ameri, <i>J Evid Based Complementary Altern Med</i> , 2016 (17)     |
|                                      |                                            | Randomized                                                                                                                         | Topical alpha ointment (containing henna) was more effective in healing of radiation-induced dermatitis than topical hydrocortisone cream (breast cancer)                             | Ansari, <i>Iran J Med Sci</i> , 2013 (18)                           |
|                                      |                                            | Randomized                                                                                                                         | HESA-A herbal-marine formula improves vision and pain (breast cancer with choroidal metastasis)                                                                                       | Ahmadi, <i>Med Sci Monit</i> , 2005 (19)                            |
|                                      | Manual/movement therapies                  | Randomized                                                                                                                         | Reduced pain and fatigue during chemotherapy                                                                                                                                          | Aghabati, <i>Evid Based Complement Alternat Med</i> , 2008 (20)     |
|                                      | Nutritional interventions                  | Randomized                                                                                                                         | Onion consumption ameliorates hyperglycemia and insulin resistance during doxorubicin-based chemotherapy (breast cancer)                                                              | Jafarpour-Sadegh, <i>Integr Cancer Ther</i> , 2016 (21)             |
| Israel                               | Anthroposophic medicine                    | Nonrandomized                                                                                                                      | Art therapy alleviates depression and fatigue in cancer patients during chemotherapy                                                                                                  | Bar-Sela, <i>Psycho-oncol</i> , 2007 (22)                           |
|                                      |                                            | Randomized                                                                                                                         | Chemotherapy dose reductions, severe nonhematological side effects, and hospitalizations were less frequent in patients treated with <i>Viscum album</i> (non-small cell lung cancer) | Bar-Sela, <i>Eur J Cancer</i> , 2013 (23)                           |
|                                      |                                            | Nonrandomized                                                                                                                      | Intraperitoneal administrations of <i>Viscum album</i> reduces the need for repeat drainage in patients with malignant ascites                                                        | Bar-Sela, <i>Anticancer Res</i> , 2006 (24)                         |
|                                      | Herbal/traditional medicine                | Randomized                                                                                                                         | The addition of LCS101 to anthracycline- and taxane-based chemotherapy may significantly prevent chemotherapy-induced hematological toxicities (breast cancer)                        | Yaal-Hahoshen, <i>Oncologist</i> , 2011(25)                         |
|                                      |                                            | Randomized                                                                                                                         | Garlic extract did not reduce febrile neutropenia risk in the entire cohort, but appeared to exert a protective effect in the lower-risk subgroup (hematological malignancies)        | Gatt, <i>Integr Cancer Ther</i> , 2015 (26)                         |
|                                      |                                            | Nonrandomized                                                                                                                      | <i>Triticum aestivum</i> (wheatgrass juice) reduces hematological toxicity (breast cancer)                                                                                            | Bar-Sela, <i>Nutr Cancer</i> , 2007 (27)                            |
|                                      | Homeopathy                                 | Randomized                                                                                                                         | Traumeel S supplement improves stomatitis (hemato-oncology)                                                                                                                           | Oberbaum, <i>Cancer</i> , 2001 (28)                                 |
| Mind-body medicine                   | Nonrandomized                              | Hypnosis improves xerostomia in patients with head and neck cancer                                                                 | Schiff, <i>J Pain Symptom Manage</i> , 2009 (29)                                                                                                                                      |                                                                     |
|                                      | Randomized                                 | Progressive muscle relaxation with guided imagery reduces distress                                                                 | Baider, <i>Gen Hosp Psychiatry</i> , 2001 (30)                                                                                                                                        |                                                                     |
| Patient-tailored integrative program | Preference non-randomized controlled study | Improved sleep, social functioning, and global health status observed in Russian-speaking patients undergoing chemotherapy         | Sharabi, <i>Support Care Cancer</i> , 2016 (31)                                                                                                                                       |                                                                     |
|                                      | Preference non-randomized controlled study | Improved cancer-related fatigue during chemotherapy (gynecologic cancer)                                                           | Ben-Arye, <i>Support Care Cancer</i> , 2015 (32)                                                                                                                                      |                                                                     |
|                                      | Preference non-randomized controlled study | Improved appetite, drowsiness, shortness of breath, and sleep in patients reporting gastro-intestinal symptoms during chemotherapy | Ben-Arye, <i>Clin Nutr</i> , 2015 (33)                                                                                                                                                |                                                                     |

(continued)

Table 1. (continued)

| Country      | CIM* modality                      | Study format  | Impact of CIM on supportive care–related outcomes                                                    | First author, journal, year (ref.)                   |
|--------------|------------------------------------|---------------|------------------------------------------------------------------------------------------------------|------------------------------------------------------|
| Saudi Arabia | Herbal/<br>traditional<br>medicine | Randomized    | Mouth rinse containing olive leaf extract improves oral mucositis in patients receiving chemotherapy | Ahmed, <i>Saudi Dent J</i> , 2013 (34)               |
| Turkey       | Herbal/<br>traditional<br>medicine | Randomized    | Ginger decreases severity of nausea and the number of vomiting episodes (breast cancer)              | Arslan, <i>Clin J Oncol Nurs</i> , 2015 (35)         |
|              | Nutritional<br>interventions       | Randomized    | Kefir (yogurt) improves sleep disturbances in patients undergoing chemotherapy (colorectal cancer)   | Can, <i>Oncol Nurs Forum</i> , 2009 (36)             |
|              | Yoga                               | Nonrandomized | Improved fatigue and sleep in the yoga group compared with an exercise group (breast cancer)         | Ulger, <i>Complement Ther Clin Pract</i> , 2015 (37) |

\*CIM = complementary integrative medicine.

sources in parallel. A recently published study conducted in Israel and the Palestinian Authority showed that patients with cancer favor a model of care in which CTM is integrated as part of conventional supportive cancer care, with the goals of reducing the many side effects of oncology treatments and improving quality of life (QOL) (2,3). The findings of this research have shown that a change in attitudes is taking place, both with respect to the expectations of patients regarding the role of CTM in improving QOL, and for providing hope that CTM will improve survival or prevent recurrence or metastatic disease.

In a recently published regional survey among 339 health care providers from 16 Middle-Eastern countries, the majority of respondents favored the integration of CTM within conventional supportive cancer care, while recognizing the need for education and training in this field (4). Additional studies exploring the perspectives of patients, oncology health care providers, and CTM practitioners have suggested that these three partners, who share the “journey” of cancer care, have three common goals, the first of which is bridging the patient-oncologist communication gap through the participation of integrative physicians (IPs) in the multidisciplinary oncology health care team. IPs can provide open, nonjudgmental, evidence-based guidance in the integration of CTM in supportive cancer care in a way that resonates with patients’ health belief models and their affinity toward traditional medicine. The second goal is focusing CTM treatments on the improvement of QOL-related outcomes, and the third and final goal is to minimize the risks associated with CTM use, including the potential for interactions between herbal products and oncology drugs that can compromise their effectiveness and safety (5,6,7).

The increasing interest in the integration of CTM in the conventional supportive care setting has led to a number of collaborative efforts between multinational teams of researchers, such as the Middle-East Research Group in Integrative Oncology (MERGIO). This group is part of the Middle-East Cancer Consortium (MECC), a body supported by the National Cancer Institute. MERGIO currently facilitates a number of innovative educational, research, and clinical projects that are examining the effectiveness and safety of traditional herbal remedies in cancer care. In order to create a structured, pragmatic “bedside-to-bench” and subsequent “back-to-bedside” approach, MERGIO has designed a patient-tailored integrative oncology model of supportive-palliative care.

An example of one such project is the identification of herbal medicinal products that are in common use in oncology settings throughout the Middle East. This research has led to the conclusion that of the 44 herbal products identified, at least 29 have

potential safety-related issues, including negative herb-drug interactions and the directly toxic effects of these products (8). Another of the MERGIO projects is focused on the role of an integrative approach that can bridge cross-cultural gaps between refugees from the Middle East and their European oncology health care providers. This research aims to examine the extent to which an integrative medicine approach may mediate between those immigrants for whom traditional medicine is the dominant perceived health care model and the conventional care model provided by their European host countries.

### The Role of Middle-Eastern Traditional Medicine in Promoting Integration

There has been a significant increase in recent years in the number of articles published in both basic and clinical scientific research in integrative oncology that have originated from Middle-Eastern countries. At least 15 of these studies have come from Egypt, Jordan, Lebanon, Morocco, the Palestinian Authority, Saudi-Arabia, and Tunisia, and an additional 50 papers have come from countries such as Israel, Turkey, and Iran (1). The research covers a wide range of subjects, reflecting the widely diverse spectrum of CTM modalities used throughout the region. The studies have focused primarily on traditional and herbal medicine, as well as nutritional interventions, mind-body practices, manual/movement therapies, anthroposophic medicine, and homeopathy. The clinical studies that have been published often serve as a continuation of preclinical in vitro research, with the aim of identifying traditional herbs with potential clinical significance in cancer care (9).

In countries such as Israel, clinical research has also addressed the impact of integrative oncology services, which are now part of seven oncology centers across the country. A multidisciplinary team of researchers and clinicians in this country has published a large body of research on the effectiveness of a patient-tailored integrative program. The program works according to a culturally sensitive design that addresses the expectations and QOL-related concerns of patients from both Arab and Jewish communities. The research on the integrative program employs a pragmatic, preference-controlled design, addressing the impact of the integrative program on specific and nonspecific QOL-related outcomes. It has also examined the impact of integrative oncology on disease- and treatment-related adverse effects, including cancer-related fatigue, gastro-intestinal concerns, anxiety, insomnia, and general well-being (Table 1) (10,11).

## Conclusion

Integrative oncology research is evolving at a fast pace throughout the Middle East. The findings of this research are being translated into integrative oncology models, with a “bench-to bedside” approach of preclinical-to-clinical research. International research collaborations in integrative oncology are facilitated by groups such as MERGIO, which works within the MECC initiative with the support of the US National Cancer Institute. The findings of these research initiatives are important in other countries and societies as well, especially when cross-cultural medicine is a key concept of care, as is the case among many minority groups and immigrant populations. These initiatives should be enhanced by initiatives such as the promotion of collaboration with the international community and with the establishment of a Research Center for Excellence in integrative oncology. They should also be empowered by bodies such as the World Health Organization, which has already recognized palliative care as a leading objective, following the 2014 World Health Assembly resolution WHA67.19 (38). The creation of a central body coordinating research efforts in CTM would significantly advance the patient-centered care that is currently taking place, creating a framework for a shared decision-making, culturally sensitive, and evidence-based approach to patient care. It would also significantly enhance the impact of CTM in conventional supportive cancer care models.

## References

- Ben-Arye E. Integrating complementary medicine in cancer supportive care across the Middle East: Challenges and opportunities. In: M Silbermann, ed. *Palliative Care to the Cancer Patient: The Middle East as a Model to Emerging Countries*. New York: Nova Science Publishers; 2014:77–97.
- Ben-Arye E, Massalha E, Bar-Sela G, et al. Stepping from traditional to integrative medicine: Perspectives of Israeli-Arab patients on complementary medicine's role in cancer care. *Ann Oncol*. 2014;25(2):476–480.
- Ben-Arye E, Hamadeh AM, Schiff E, et al. Compared perspectives of Arab patients in Palestine and Israel on the role of complementary medicine in cancer care. *J Pain Symptom Manage*. 2015;49(5):878–884.
- Ben-Arye E, Schiff E, Mutafoglu K, et al. Integration of complementary medicine in supportive cancer care: Survey of health-care providers' perspectives from 16 countries in the Middle East. *Support Care Cancer*. 2015;23(9):2605–2612.
- Popper-Giveon A, Schiff E, Ben-Arye E. We and they in the house of healing: Debate among Arab complementary medicine practitioners on an integrative versus alternative approach to supportive cancer care. *Integr Cancer Ther*. 2013;12(6):488–495.
- Samuels N, Schiff E, Lavie O, Raz OG, Ben-Arye E. Expectations from an integrative medicine consultation in breast cancer care: A registry protocol-based study. *Support Care Cancer*. 2015;23(2):317–324.
- Ben-Arye E, Popper-Giveon A, Samuels N, et al. Communication and integration: A qualitative analysis of perspectives among Middle Eastern oncology healthcare professionals on the integration of complementary medicine in supportive cancer care. *J Cancer Res Clin Oncol*. 2016;142(5):1117–1126.
- Ben-Arye E, Samuels N, Goldstein LH, et al. Potential risks associated with traditional herbal medicine use in cancer care: A study of Middle Eastern oncology health care professionals. *Cancer*. 2016;122(4):598–610.
- Ben-Arye E, Schiff E, Hassan E, et al. Integrative oncology in the Middle East: From traditional herbal knowledge to contemporary cancer care. *Ann Oncol*. 2012;23(1):211–221.
- Keshet Y, Schiff E, Samuels N, Ben-Arye E. Giving voice to cancer patients: Assessing non-specific effects of an integrative oncology therapeutic program via short patient narratives. *Psychooncology*. 2015;24(2):169–174.
- Ben-Arye E, Aharonson ML, Schiff E, Samuels N. Alleviating gastro-intestinal symptoms and concerns by integrating patient-tailored complementary medicine in supportive cancer care. *Clin Nutr*. 2015;34(6):1215–1223.
- Charalambous A, Giannakopoulou M, Bozas E, Paikousis L. A randomized controlled trial for the effectiveness of progressive muscle relaxation and guided imagery as anxiety reducing interventions in breast and prostate cancer patients undergoing chemotherapy. *Evid Based Complement Alternat Med*. 2015;2015:270876.
- Rashad UM, Al-Gezawy SM, El-Gezawy E, Azzaz AN. Honey as topical prophylaxis against radiochemotherapy-induced mucositis in head and neck cancer. *J Laryngol Otol*. 2008;119:1–6.
- Abdulrhman M, Elbarbary NS, Ahmed Amin D, Saeid Ebrahim R. Honey and a mixture of honey, beeswax, and olive oil-propolis extract in treatment of chemotherapy-induced oral mucositis: A randomized controlled pilot study. *Pediatr Hematol Oncol*. 2012;29(3):285–292.
- Motalebnejad M, Akram S, Moghadamnia A, Moulana Z, Omid S. The effect of topical application of pure honey on radiation-induced mucositis: A randomized clinical trial. *J Contemp Dent Pract*. 2008;9(3):40–47.
- Miranzadeh S, Adib-Hajbaghery M, Soleymanpoor L, Ehsani M. Effect of adding the herb *Achillea millefolium* on mouthwash on chemotherapy induced oral mucositis in cancer patients: A double-blind randomized controlled trial. *Eur J Oncol Nurs*. 2015;19(3):207–213.
- Ameri A, Heydarirad G, Rezaeizadeh H, Choopani R, Ghobadi A, Gachkar L. Evaluation of efficacy of an herbal compound on dry mouth in patients with head and neck cancers: A randomized clinical trial. *J Evid Based Complement Alternat Med*. 2016;21(1):30–33.
- Ansari M1, Farzin D, Mosalaei A, Omidvari S, Ahmadloo N, Mohammadianpanah M. Efficacy of topical alpha ointment (containing natural henna) compared to topical hydrocortisone (1%) in the healing of radiation-induced dermatitis in patients with breast cancer: A randomized controlled clinical trial. *Iran J Med Sci*. 2013;38(4):293–300.
- Ahmadi A, Mohagheghi MA, Fazeli MS, et al. HESA-A: New treatment for breast cancer and choroidal metastasis. *Med Sci Monit*. 2005;11(6):CR300–CR303.
- Aghabati N, Mohammadi E, Pour Esmail Z. The effect of therapeutic touch on pain and fatigue of cancer patients undergoing chemotherapy. *Evid Based Complement Alternat Med*. 2010;7(3):375–381.
- Jafarpour-Sadegh F, Montazeri V, Adili A, Esfehiani A, Rashidi MR, Pirouzpanah S. Consumption of fresh yellow onion ameliorates hyperglycemia and insulin resistance in breast cancer patients during doxorubicin-based chemotherapy: A randomized controlled clinical trial. *Integr Cancer Ther*. 2017;16(3):276–289.
- Bar-Sela G, Atid L, Danos S, Gabay N, Epelbaum R. Art therapy improved depression and influenced fatigue levels in cancer patients on chemotherapy. *Psychooncology*. 2007;16(11):980–984.
- Bar-Sela G, Wollner M, Hammer L, Agbarya A, Dudnik E, Haim N. Mistletoe as complementary treatment in patients with advanced non-small-cell lung cancer treated with carboplatin-based combinations: A randomised phase II study. *Eur J Cancer*. 2013;49(5):1058–1064.
- Bar-Sela G, Goldberg H, Beck D, Amit A, Kuten A. Reducing malignant ascites accumulation by repeated intraperitoneal administrations of a *Viscum album* extract. *Anticancer Res*. 2006;26(1B):709–713.
- Yaal-Hahoshen N, Maimon Y, Siegelmann-Danieli N, et al. A prospective, controlled study of the botanical compound mixture LCS101 for chemotherapy-induced hematological complications in breast cancer. *Oncologist*. 2011;16(9):1197–1202.
- Gatt ME, Strahilevitz J, Sharon N, et al. A randomized controlled study to determine the efficacy of garlic compounds in patients with hematological malignancies at risk for chemotherapy-related febrile neutropenia. *Integr Cancer Ther*. 2015;14(5):428–435.
- Bar-Sela G, Tsalic M, Fried G, Goldberg H. Wheat grass juice may improve hematological toxicity related to chemotherapy in breast cancer patients: A pilot study. *Nutr Cancer*. 2007;58(1):43–48.
- Oberbaum M, Yaniv I, Ben-Gal Y, et al. A randomized, controlled clinical trial of the homeopathic medication TRAUMEEL S in the treatment of chemotherapy-induced stomatitis in children undergoing stem cell transplantation. *Cancer*. 2001;92(3):684–690.
- Schiff E, Mogilner GJ, Sella E, et al. Hypnosis for post-radiation xerostomia in head and neck cancer patients: A pilot study. *J Pain Symptom Manage*. 2009;37(6):1086–1092.
- Baidar L, Peretz T, Hadani PE, Koch U. Psychological intervention in cancer patients: A randomized study. *Gen Hosp Psychiatry*. 2001;23(5):272–277.
- Sharabi IS, Levin A, Schiff E, et al. Quality of life-related outcomes from a patient-tailored integrative medicine program: Experience of Russian-speaking patients with cancer in Israel. *Support Care Cancer*. 2016;24(10):4345–4355.
- Ben-Arye E, Samuels N, Schiff E, Raz OG, Sharabi IS, Lavie O. Quality-of-life outcomes in patients with gynecologic cancer referred to integrative oncology treatment during chemotherapy. *Support Care Cancer*. 2015;23(12):3411–3419.
- Ben-Arye E, Aharonson ML, Schiff E, Samuels N. Alleviating gastro-intestinal symptoms and concerns by integrating patient-tailored complementary medicine in supportive cancer care. *Clin Nutr*. 2015;34(6):1215–1223.
- Ahmed KM. The effect of olive leaf extract in decreasing the expression of two pro-inflammatory cytokines in patients receiving chemotherapy for cancer. A randomized clinical trial. *Saudi Dent J*. 2013;25(4):141–147.
- Arslan M, Ozdemir L. Oral intake of ginger for chemotherapy-induced nausea and vomiting among women with breast cancer. *Clin J Oncol Nurs*. 2015;19(5):E92–E97.
- Can G, Topuz E, Derin D, Durna Z, Aydiner A. Effect of kefir on the quality of life of patients being treated for colorectal cancer. *Oncol Nurs Forum*. 2009;36(6):E335–E342.
- Yagli NV, Ulger O. The effects of yoga on the quality of life and depression in elderly breast cancer patients. *Complement Ther Clin Pract*. 2015;21(1):7–10.
- World Health Organization. Palliative care. Fact sheet No. 402. July 2015. <http://www.who.int/mediacentre/factsheets/fs402/en/>. Accessed September 1, 2017.
